# Supplementary material for: Proximity-induced magnetic order in topological insulator on ferromagnetic semiconductor
Source: Springer Nature journal article supplement (doi:10.1007/s11432-023-3841-9), 2023-11-08
Supplement: 11432_2023_3841_MOESM1_ESM.pdf [file 11432_2023_3841_MOESM1_ESM.pdf]

• Supplementary File •

# Proximity-Induced Magnetic Order in Topological Insulator on Ferromagnetic Semiconductor

Hangtian Wang<sup>1,2</sup>, Koichi Murata<sup>3</sup>, Weiran Xie<sup>1</sup>, Jing Li<sup>1</sup>, Jie Zhang<sup>1\*</sup>, Kang L. Wang<sup>3</sup>,  
Weisheng Zhao<sup>1,2</sup> & Tianxiao Nie<sup>1,2\*</sup>

<sup>1</sup>*School of Integrated Circuit Science and Engineering and Advanced Innovation Center for Big Data and Brain Computing, Beihang University, Beijing 100191, China;*

<sup>2</sup>*Beihang-Goertek Joint Microelectronics Institute, Qingdao Research Institute, Beihang University, Qingdao 266000, China;*

<sup>3</sup>*Department of Electrical Engineering, University of California, Los Angeles, California 90095, USA*

## Appendix A TEM images of Ge-Se grain and Bi<sub>2</sub>Se<sub>3</sub> crystal

During the heterostructure preparation, the growth temperature of the substrate must be strictly kept at 200°C. Above it, a Se-Ge impurity phase will be easily formed instead of Bi<sub>2</sub>Se<sub>3</sub>, which could be verified by TEM results in Figure A1. Figure A1(a) shows two separated Ge-Se grains on Mn<sub>x</sub>Ge<sub>1-x</sub>, the size of these grains is approximately 100 nm. No obvious connection was observed between the two grains, demonstrating the island growth mode of Ge-Se. Figure A1(b) is the corresponding zoom-in TEM image of the Ge-Se grain. On the contrary, Bi<sub>2</sub>Se<sub>3</sub> film shows a perfect crystallinity due to its 2D growth mode, as shown in Figure A1(c).

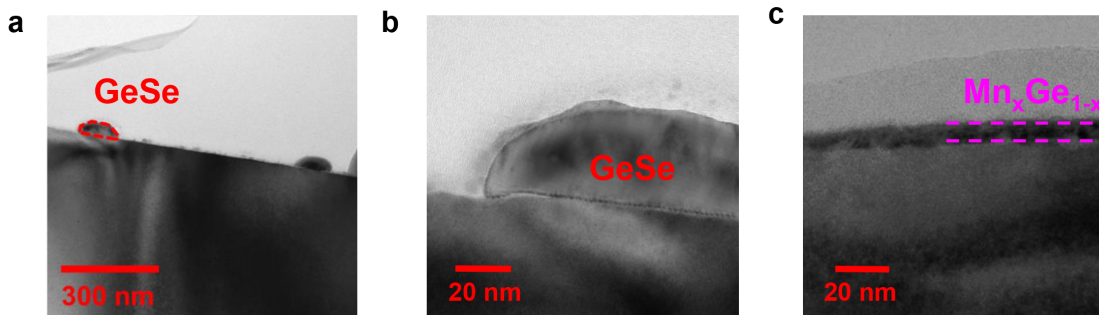

**Figure A1** TEM images of Ge-Se grain and Bi<sub>2</sub>Se<sub>3</sub> crystal. (a) TEM images of the Ge-Se impurity phase on Mn<sub>x</sub>Ge<sub>1-x</sub>. (b) A magnified TEM image of the crystal structure of Ge-Se grains. (c) TEM images of pure Bi<sub>2</sub>Se<sub>3</sub> on Mn<sub>x</sub>Ge<sub>1-x</sub>. A flat surface morphology and sharp Mn<sub>x</sub>Ge<sub>1-x</sub>/Bi<sub>2</sub>Se<sub>3</sub> interface can be clearly observed.

## Appendix B Transport measurements for pure Mn<sub>x</sub>Ge<sub>1-x</sub> (x=0.04)

To exclude the contribution of the Mn<sub>x</sub>Ge<sub>1-x</sub> conductance channels on the heterostructure, a 20 nm Mn<sub>x</sub>Ge<sub>1-x</sub> (x=0.04) film was prepared with the same growth condition as the heterostructure for the transport measurement. The temperature-dependent Hall curves of Mn<sub>x</sub>Ge<sub>1-x</sub> are shown in Figure A2(a). A clear magnetic hysteresis loop could be observed up to 150 K. As the temperature continuously increases, the hysteresis loop gradually degrades, which indicates that the Mn<sub>x</sub>Ge<sub>1-x</sub> thin film goes through a transition from a ferromagnetic to a paramagnetic state at 150 K-200 K. The same conclusion could be obtained in Figure A2(b), the MR of Mn<sub>x</sub>Ge<sub>1-x</sub> thin film shows a negative behavior from 1.9 K-150K, indicating that the  $T_c$  of Mn<sub>x</sub>Ge<sub>1-x</sub> is around 150 K. By contrast, no hysteresis loop is observed in pure Bi<sub>2</sub>Se<sub>3</sub> even at 1.9 K, as shown in the inset in Figure A2(a). Notably, the MR of Mn<sub>x</sub>Ge<sub>1-x</sub> (0.1% at 1T) is much smaller than that of the Bi<sub>2</sub>Se<sub>3</sub>/Mn<sub>x</sub>Ge<sub>1-x</sub> heterostructure (2% at 1T, Figure 2f), which proves that the Mn<sub>x</sub>Ge<sub>1-x</sub> conductance is almost negligible for the transport channels in the heterostructure.

\* Corresponding author (email: zhangjie2019@buaa.edu.cn, nietianxiao@buaa.edu.cn)

† Hangtian Wang and Weiran Xie have the same contribution to this work.

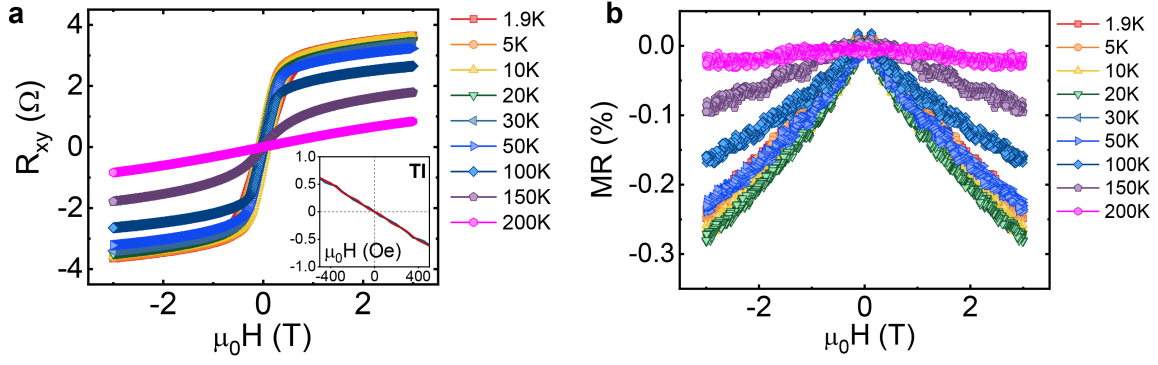

**Figure B1** Transport measurements for pure  $Mn_xGe_{1-x}$  ( $x=0.04$ ). (a) The temperature-dependent Hall and (b) MR curves. Inset: the Hall curve for pure  $Bi_2Se_3$  at 1.9K

### Appendix C Transport measurements for pure $Bi_2Se_3$ and the heterostructure

To analyze the quantum corrections to conductivity from WL and WAL, the temperature-dependent resistance and conductivity of pure  $Bi_2Se_3$  and the heterostructure are extracted in Figure A3. Figure A3(a) describes the resistance-temperature ( $R$ - $T$ ) curve for  $Bi_2Se_3$  film. The plateau from 1.9 K-10 K results from the freezing of the bulk carriers in  $Bi_2Se_3$ . After converting it to a conductivity plot (Figure A3(c)), a logarithmic conductivity increase can be observed, which comes from the quantum correction by WAL and EEI in the surface states. In the heterostructure, the same logarithmic increase can be noticed, as shown in Figure A3(b) and A3(d), which results from the combined effect of quantum corrections induced by WAL, WL, and EEI effects.

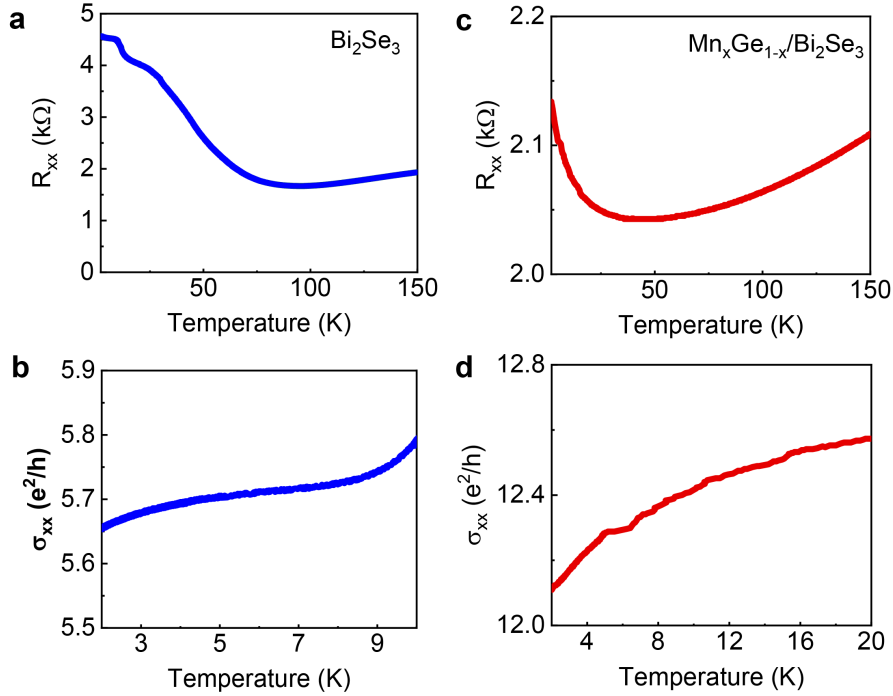

**Figure C1** Transport measurements for pure  $Bi_2Se_3$  and the heterostructure. (a, b)  $R$ - $T$  curves for two samples. (c, d) The quantum correction induced logarithmic conductivities increase in low-temperature regions.

### Appendix D Estimation of the surface state gap size

In the heterostructure, both the WAL prefactor  $\alpha_1$  and WL prefactor  $\alpha_2$  in the quantum interferences are related to the band gap in the surface states and the Fermi level  $E_F$ . Specifically,  $\alpha_1$  and  $\alpha_2$  can be expressed as [1]:

$$\alpha_1 = -\frac{a^4 b^4}{(a^4 + b^4)(a^4 + b^4 - a^2 b^2)} \quad (D1)$$

$$\alpha_2 = \frac{(a^4 + b^4)(a^2 - b^2)^2}{2(a^4 + b^4 - a^2 b^2)^2} \quad (D2)$$

Here  $a \equiv \cos \frac{\Theta}{2}$ ,  $b \equiv \sin \frac{\Theta}{2}$ , and  $\cos \Theta \equiv \frac{\Delta}{2E_F}$ . Obviously, either  $\alpha_1$  or  $\alpha_2$  is determined by the bandgap size ( $\Delta$ ). In topological surface states, the band is gapless with  $\cos \Theta \rightarrow 0$ , then the conductance channel is dominated by the WAL effect with  $\alpha_1=-1/2$  and  $\alpha_2=0$ . By contrast, if a surface state gap is opened by magnetism, and the Fermi level locates in the gap ( $\cos \Theta \rightarrow 1$ ), the quantum correction can be driven into the WL regime with  $\alpha_1=0$  and  $\alpha_2=1/2$ . In addition, the Fermi level position relative to the Dirac point  $E_F$  can be estimated by the formula [2]:

$$E_F = \hbar/(2m^*)(3\pi N_{BD})^{2/3} \quad (D3)$$

Here the effective mass  $m^*$  is assumed to be  $m^* \approx 0.15m_e$ , and the bulk carrier density  $N_{BD}$  at 1.9 K can be extracted as  $9.4 \times 10^{18} \text{ cm}^{-3}$  from Figure 2d. Therefore, the  $E_F$  of  $\text{Bi}_2\text{Se}_3$  in the heterostructure is fixed approximately at  $\sim 0.113 \text{ eV}$ . Finally, by using the value of  $E_F$  and the obtained  $\alpha_1$ ,  $\alpha_2$  in Figure 4a, the surface state bandgap of the  $\text{Bi}_2\text{Se}_3$  layer is estimated to be  $\Delta \approx 80 \text{ meV}$  at 1.9 K.

#### References

- 1 ALu H-Z, Shi J, Shen S-Q. Competition between Weak Localization and Antilocalization in Topological Surface States. *Phys Rev Lett*, 2011, 107: 076801
- 2 Brahlek M, Koirala N, Bansal N, et al. Transport properties of topological insulators: Band bending, bulk metal-to-insulator transition, and weak anti-localization. *Solid State Commun*, 2015, 215-216: 54-62
